# Supplementary material for: High-Throughput Method for the Simultaneous Determination of Doxorubicin Metabolites in Rat Urine after Treatment with Different Drug Nanoformulations
Source: MDPI journal article supplement (doi:10.3390/molecules27041177), 2022-02-09
Supplement: s1 [file s1]

## Supplementary Materials

# High-Throughput Method for the Simultaneous Determination of Doxorubicin Metabolites in Rat Urine after Treatment with Different Drug Nanoformulations

Lara Zorić <sup>1</sup>, Nikša Drinković <sup>2</sup>, Vedran Micek <sup>3</sup>, Leo Frkanec <sup>4</sup>, Akif Emre Türeli <sup>5</sup>, Nazende Günday-Türeli <sup>5</sup>, Ivana Vinković Vrček <sup>3,\*</sup> and Ruža Frkanec <sup>6,\*</sup>

<sup>1</sup> Faculty of Pharmacy and Biochemistry, University of Zagreb, Ante Kovačića 1, 10000 Zagreb, Croatia; larazoric488@gmail.com

<sup>2</sup> Poliklinika Prof. Nikša Drinković, Boškovićeva ul. 15, 10000 Zagreb, Croatia; ndrink@gmail.com

<sup>3</sup> Institute for Medical Research and Occupational Health, Ksaverska cesta 2, 10000 Zagreb, Croatia; vmicek@imi.hr

<sup>4</sup> Rudjer Boskovic Institute, Bijenička cesta 54, 10000 Zagreb, Croatia; frkanec@irb.hr

<sup>5</sup> MyBiotech GmbH, Industriestraße 1B, 66802 Überherrn, Germany; e.tuereli@mybiotech.de (A.E.T.); n.guenday-tuereli@mybiotech.de (N.G.-T.)

<sup>6</sup> University of Zagreb, Centre for Research and Knowledge Transfer in Biotechnology, Rockefellerova 10, 10000 Zagreb, Croatia

\* Correspondence: ivinkovic@imi.hr (I.V.V.); rfrkanec@unizg.hr (R.F.)

### The linearity of the method

The samples were injected three times, and the mean value of the chromatogram area were calculated. The results are presented graphically (Figures S1-S3) and tabularly (Table S1) for each metabolite. The correlation coefficients are calculated.

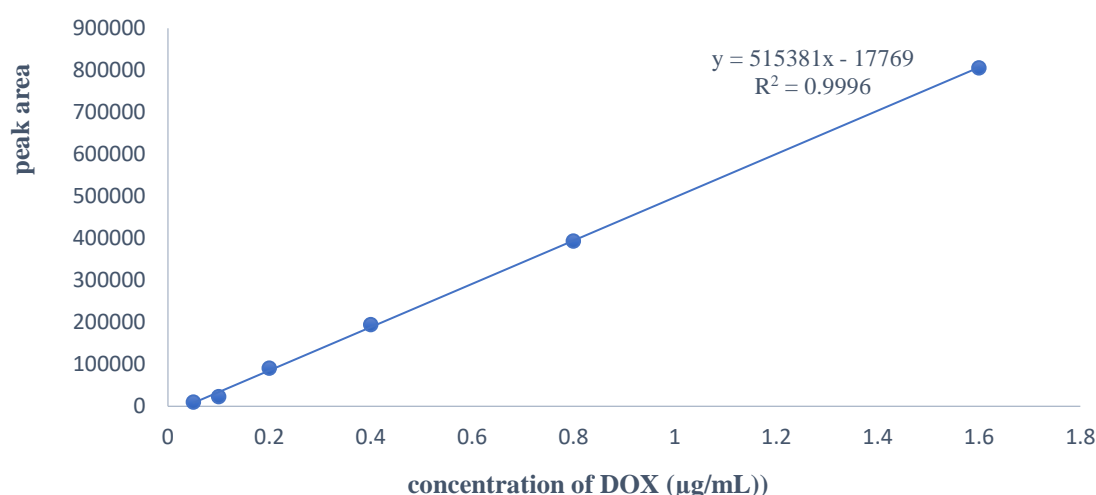

Figure S1. Calibration curve for DOXon.

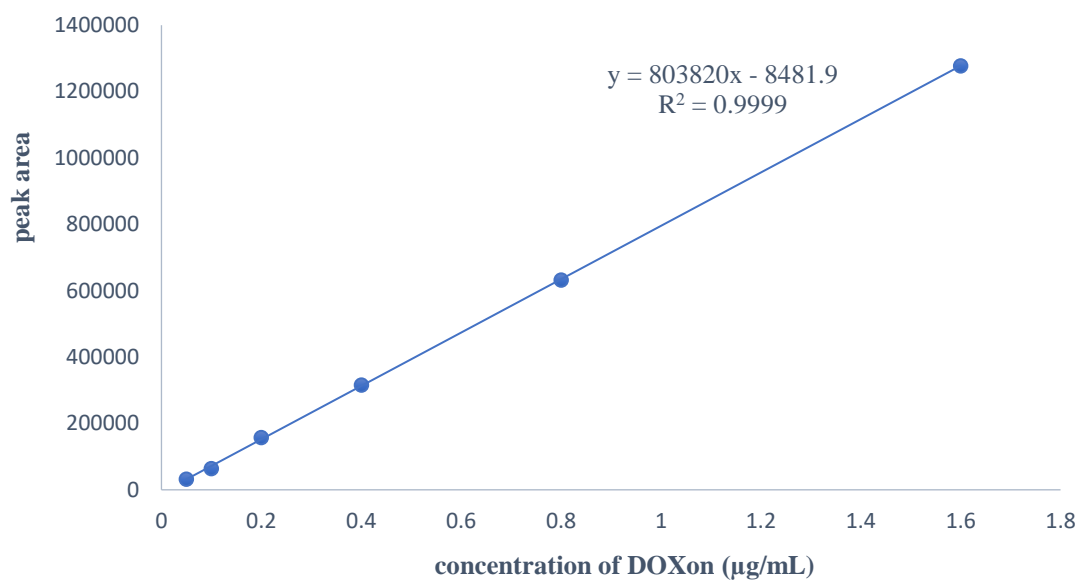

**Figure S2.** Calibration curve for DOXon.

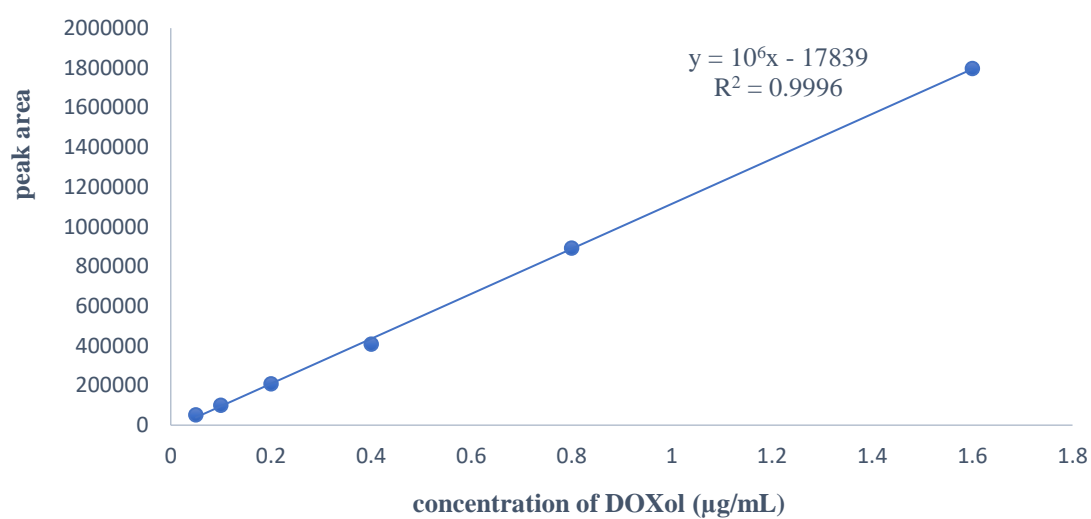

**Figure S3.** Calibration curve for DOXol.

**Table S1.** Parameters of linearity.

| Metabolite | Linearity area (µg/mL) | Equation of a Line            | Factor of regression (R <sup>2</sup> ) |
|------------|------------------------|-------------------------------|----------------------------------------|
| DOX        | 0,05 – 1,60            | y = 515381x - 17769           | 0,9996                                 |
| DOXol      | 0,05 – 1,60            | y = 10 <sup>6</sup> x - 17839 | 0,9996                                 |
| DOXon      | 0,05 – 1,60            | y = 803820x - 848             | 0,9999                                 |

**Table S2.** Concentration of doxorubicin (DOX) and its metabolites doxorubicinol (DOXol) and doxorubiconone (DOXon) in urine of female Wistar rats after each of 4 intraperitoneal applications of DOX-IN, DOX-MY and DOX-PLGA.

| Exp group  | Exp animal | Metabolites (µg/mL) |      |      |      |             |      |      |      |               |      |      |      |
|------------|------------|---------------------|------|------|------|-------------|------|------|------|---------------|------|------|------|
|            |            | Doxorubicinol       |      |      |      | Doxorubicin |      |      |      | Doxorubicinon |      |      |      |
|            |            | 1                   | 2    | 3    | 4    | 1           | 2    | 3    | 4    | 1             | 2    | 3    | 4    |
| F DOX-IN   | 1          | 0,22                | 0,41 | 0,17 | 0,27 | 0,15        | 1,54 | 0,32 | 0,94 | 0,00          | 0,01 | 0,00 | 0,00 |
|            | 2          | 0,23                | 0,20 | 0,21 | 0,24 | 0,29        | 0,82 | 1,22 | 1,02 | 0,00          | 0,00 | 0,00 | 0,00 |
|            | 3          | 0,15                | 0,35 | 0,33 | 0,34 | 0,21        | 1,29 | 1,28 | 1,25 | 0,00          | 0,02 | 0,00 | 0,00 |
|            | 4          | 0,20                | 0,54 | 0,14 | 0,42 | 0,35        | 2,83 | 0,58 | 1,66 | 0,00          | 0,01 | 0,00 | 0,00 |
|            | 5          | 0,09                | 0,22 | 0,12 | 0,22 | 0,10        | 1,29 | 0,63 | 1,34 | 0,00          | 0,00 | 0,00 | 0,00 |
|            | 6          | 0,11                | 0,15 | 0,11 | 0,26 | 0,17        | 0,90 | 0,65 | 1,26 | 0,00          | 0,01 | 0,00 | 0,00 |
|            | 7          | 0,24                | 0,19 | 0,11 | 0,31 | 0,65        | 0,81 | 0,63 | 1,81 | 0,00          | 0,00 | 0,00 | 0,00 |
|            | 8          | 0,21                | 0,32 | 0,33 | 0,27 | 0,87        | 1,06 | 1,18 | 1,54 | 0,02          | 0,00 | 0,00 | 0,00 |
| F DOX-PLGA | 1          | 0,08                | 0,15 | 0,12 | 0,00 | 0,48        | 0,84 | 0,81 | 1,96 | 0,00          | 0,03 | 0,00 | 0,00 |
|            | 2          | 0,15                | 0,16 | 0,11 | 0,29 | 0,62        | 0,90 | 0,88 | 1,14 | 0,00          | 0,02 | 0,00 | 0,00 |
|            | 3          | 0,19                |      | 0,28 | 0,25 | 0,63        |      | 1,14 | 0,98 | 0,00          |      | 0,00 | 0,00 |
|            | 4          | 0,17                | 0,22 |      | 0,00 | 0,52        | 1,10 |      | 1,70 | 0,00          | 0,00 |      | 0,00 |
|            | 5          | 0,04                | 0,14 | 0,09 | 0,24 | 0,26        | 0,72 | 0,97 | 1,75 | 0,00          | 0,03 | 0,09 | 0,00 |
|            | 6          | 0,14                | 0,12 | 0,17 | 0,36 | 0,65        | 0,53 | 1,17 | 1,62 | 0,00          | 0,00 | 0,05 | 0,00 |
|            | 7          | 0,16                | 0,10 | 0,12 | 0,36 | 0,75        | 0,40 | 0,91 | 0,68 | 0,00          | 0,00 | 0,00 | 0,00 |
|            | 8          |                     | 0,39 | 0,21 | 0,08 |             | 2,02 | 0,81 | 0,76 |               | 0,08 | 0,00 | 0,00 |
| F DOX-MY   | 1          | 0,04                | 0,24 | 0,04 |      | 0,13        | 0,07 | 0,23 |      | 0,00          | 0,03 | 0,00 |      |
|            | 2          | 0,04                | 0,16 | 0,07 | 0,25 | 0,27        | 0,13 | 0,64 | 1,48 | 0,00          | 0,02 | 0,00 | 0,00 |
|            | 3          | 0,00                | 0,12 | 0,05 | 0,08 | 0,03        | 0,25 | 0,49 | 0,39 | 0,00          | 0,01 | 0,00 | 0,00 |
|            | 4          | 0,10                | 0,09 | 0,06 | 0,10 | 0,63        | 0,36 | 0,52 | 0,73 | 0,00          | 0,02 | 0,00 | 0,00 |
|            | 5          | 0,00                | 0,07 | 0,05 | 0,12 | 0,06        | 0,30 | 0,32 | 1,24 | 0,00          | 0,01 | 0,00 | 0,00 |
|            | 6          | 0,04                | 0,03 | 0,05 | 0,22 | 0,06        | 0,14 | 0,53 | 0,76 | 0,00          | 0,00 | 0,00 | 0,00 |
|            | 7          | 0,03                | 0,09 |      | 0,10 | 0,11        | 0,34 |      | 0,55 | 0,00          | 0,01 |      | 0,00 |
|            | 8          | 0,11                | 0,09 | 0,08 | 0,17 | 0,34        | 0,47 | 1,13 | 1,35 | 0,00          | 0,00 | 0,00 | 0,00 |

**Table S3.** Concentration of doxorubicin (DOX) and its metabolites doxorubicinol (DOXol) and doxorubicinone (DOXon) in urine of male Wistar rats after each of 4 intraperitoneal applications of DOX-IN, DOX-MY and DOX-PLGA.

| Exp group  | Exp. animal | Metabolites (µg/mL) |      |      |      |             |      |      |       |                |      |      |      |
|------------|-------------|---------------------|------|------|------|-------------|------|------|-------|----------------|------|------|------|
|            |             | Doxorubicinol       |      |      |      | Doxorubicin |      |      |       | Doxorubicinone |      |      |      |
|            |             | 1                   | 2    | 3    | 4    | 1           | 2    | 3    | 4     | 1              | 2    | 3    | 4    |
| M DOX-IN   | 1           | 0,00                | 0,48 | 0,41 | 0,00 | 0,48        | 2,81 | 1,09 | 5,39  | 0,00           | 0,06 | 0,00 | 0,00 |
|            | 2           | 0,33                | 0,65 | 0,36 | 0,00 | 0,86        | 2,64 | 1,15 | 7,07  | 0,00           | 0,05 | 0,00 | 0,00 |
|            | 3           | 1,00                | 0,54 | 0,50 | 1,04 | 1,55        | 2,82 | 1,62 | 2,87  | 0,04           | 0,04 | 0,00 | 0,00 |
|            | 4           | 2,97                | 0,38 | 0,58 | 1,47 | 2,91        | 1,79 | 1,98 | 4,97  | 0,14           | 0,01 | 0,00 | 0,00 |
|            | 5           | 0,34                | 1,31 | 0,78 | 1,34 | 0,81        | 2,33 | 1,60 | 19,53 | 0,06           | 0,01 | 0,00 | 0,00 |
|            | 6           | 0,56                | 1,07 | 0,80 | 0,52 | 1,89        | 2,34 | 3,45 | 9,79  | 0,03           | 0,05 | 0,00 | 0,00 |
|            | 7           | 0,56                | 0,53 | 0,89 | 0,29 | 0,61        | 3,88 | 3,94 | 5,40  | 0,00           | 0,00 | 0,00 | 0,00 |
|            | 8           | 0,44                | 0,62 | 0,67 | 0,59 | 0,46        | 4,14 | 3,56 | 2,37  | 0,00           | 0,05 | 0,00 | 0,00 |
| M DOX-PLGA | 1           | 1,83                | 1,08 |      | 0,35 | 0,17        | 1,37 |      | 1,90  | 0,06           | 0,08 |      | 0,00 |
|            | 2           | 1,14                | 1,64 | 0,27 | 0,24 | 0,97        | 1,13 | 1,43 | 1,32  | 0,04           | 0,02 | 0,00 | 0,00 |
|            | 3           | 0,55                | 0,42 | 0,34 | 0,32 | 2,23        | 0,99 | 1,72 | 1,91  | 0,04           | 0,01 | 0,00 | 0,00 |
|            | 4           | 0,28                | 0,50 | 0,26 | 0,29 | 1,87        | 1,26 | 1,23 | 1,48  | 0,00           | 0,00 | 0,00 | 0,00 |
|            | 5           | 0,31                | 0,29 | 0,27 | 0,24 | 1,84        | 1,33 | 1,36 | 1,22  | 0,00           | 0,02 | 0,00 | 0,00 |
|            | 6           | 0,64                | 0,37 | 0,26 | 0,23 | 2,57        | 1,49 | 1,26 | 0,92  | 0,04           | 0,04 | 0,00 | 0,00 |
|            | 7           | 0,31                | 0,30 | 0,05 | 0,38 | 1,66        | 1,32 | 0,17 | 1,72  | 0,03           | 0,00 | 2,56 | 0,00 |
|            | 8           | 0,34                | 0,76 | 0,32 | 0,50 | 1,71        | 1,60 | 1,83 | 1,73  | 0,03           | 0,04 | 0,07 | 0,00 |
| M DOX-MY   | 1           | 0,00                | 0,16 | 0,15 | 0,22 | 0,27        | 0,45 | 1,47 | 1,13  | 0,00           | 0,00 | 0,00 | 0,00 |
|            | 2           | 0,00                | 0,17 | 0,23 | 0,15 | 0,32        | 1,52 | 1,14 | 0,90  | 0,00           | 0,03 | 0,00 | 0,00 |
|            | 3           | 0,11                | 0,22 | 3,24 | 0,21 | 0,57        | 1,54 | 5,27 | 1,19  | 0,00           | 0,03 | 0,00 | 0,00 |
|            | 4           | 0,00                | 0,16 | 0,27 | 0,32 | 0,39        | 0,80 | 1,00 | 1,55  | 0,00           | 0,01 | 0,00 | 0,00 |
|            | 5           | 0,33                | 0,11 | 0,15 | 0,41 | 0,65        | 0,86 | 1,98 | 2,40  | 0,00           | 0,02 | 0,00 | 0,00 |
|            | 6           | 0,21                | 0,15 | 0,23 | 0,40 | 1,75        | 0,58 | 1,77 | 2,38  | 0,01           | 0,00 | 0,06 | 0,00 |
|            | 7           | 0,13                | 0,15 | 0,33 | 0,49 | 1,13        | 1,03 | 1,89 | 1,48  | 0,00           | 0,02 | 0,00 | 0,00 |
|            | 8           | 0,11                | 0,17 | 0,19 | 0,46 | 0,51        | 1,28 | 1,39 | 2,00  | 0,01           | 0,02 | 0,05 | 0,00 |

**Table S4.** Average concentrations of doxorubicin metabolites determined in eight female mice 12 hours after injection in four consecutive days.

| Exp. group |                    | Metabolites (µg/mL) |      |      |      |             |      |      |      |                |      |      |      |
|------------|--------------------|---------------------|------|------|------|-------------|------|------|------|----------------|------|------|------|
|            |                    | Doxorubicinol       |      |      |      | Doxorubicin |      |      |      | Doxorubicinone |      |      |      |
|            |                    | 1                   | 2    | 3    | 4    | 1           | 2    | 3    | 4    | 1              | 2    | 3    | 4    |
| F DOX      | x <sub>avg</sub> : | 0,18                | 0,30 | 0,19 | 0,30 | 0,35        | 1,32 | 0,81 | 1,35 | 0,00           | 0,01 | 0,00 | 0,00 |
|            | S <sub>d</sub> :   | 0,06                | 0,13 | 0,09 | 0,06 | 0,27        | 0,66 | 0,36 | 0,30 | 0,01           | 0,01 | 0,00 | 0,00 |
| F PD       | x <sub>avg</sub> : | 0,13                | 0,18 | 0,16 | 0,20 | 0,56        | 0,93 | 0,96 | 1,32 | 0,00           | 0,02 | 0,02 | 0,00 |
|            | S <sub>d</sub> :   | 0,05                | 0,10 | 0,07 | 0,15 | 0,16        | 0,53 | 0,15 | 0,49 | 0,00           | 0,03 | 0,04 | 0,00 |
| F MY       | x <sub>avg</sub> : | 0,05                | 0,11 | 0,06 | 0,15 | 0,20        | 0,26 | 0,55 | 0,93 | 0,00           | 0,01 | 0,00 | 0,00 |
|            | S <sub>d</sub> :   | 0,04                | 0,06 | 0,01 | 0,07 | 0,20        | 0,14 | 0,29 | 0,42 | 0,00           | 0,01 | 0,00 | 0,00 |

**Table S5.** Average concentrations of doxorubicin metabolites determined in eight male mice 12 hours after injection in four consecutive days.

| Exp. group |                    | Metabolites (µg/mL) |      |      |      |             |      |      |      |                |      |      |      |
|------------|--------------------|---------------------|------|------|------|-------------|------|------|------|----------------|------|------|------|
|            |                    | Doxorubicinol       |      |      |      | Doxorubicin |      |      |      | Doxorubicinone |      |      |      |
|            |                    | 1                   | 2    | 3    | 4    | 1           | 2    | 3    | 4    | 1              | 2    | 3    | 4    |
| M DOX      | x <sub>avg</sub> : | 0,78                | 0,70 | 0,62 | 0,66 | 1,20        | 2,84 | 2,30 | 7,17 | 0,03           | 0,03 | 0,00 | 0,00 |
|            | S <sub>d</sub> :   | 0,93                | 0,32 | 0,19 | 0,57 | 0,86        | 0,80 | 1,16 | 5,51 | 0,05           | 0,02 | 0,00 | 0,00 |
| M PD       | x <sub>avg</sub> : | 0,68                | 0,67 | 0,25 | 0,32 | 1,63        | 1,31 | 1,29 | 1,53 | 0,03           | 0,03 | 0,38 | 0,00 |
|            | S <sub>d</sub> :   | 0,55                | 0,48 | 0,09 | 0,09 | 0,75        | 0,19 | 0,54 | 0,35 | 0,02           | 0,03 | 0,96 | 0,00 |
| M MY       | x <sub>avg</sub> : | 0,11                | 0,16 | 0,60 | 0,33 | 0,70        | 1,01 | 1,99 | 1,63 | 0,00           | 0,02 | 0,01 | 0,00 |
|            | S <sub>d</sub> :   | 0,12                | 0,03 | 1,07 | 0,13 | 0,50        | 0,41 | 1,37 | 0,57 | 0,00           | 0,01 | 0,03 | 0,00 |
